# Supplementary material
Source: PubMed Central journal article supplement (PMC2519599)
Supplement: supp_82_16_7932__1.pdf [file supp_82_16_7932__1.pdf]

10 20 30 40 50 60 70 80 90 100 110  
Consensus\_B  
HXB2  
Consensus H1 4 mo  
Consensus H2 2 mo  
Consensus H3 2 mo  
Consensus H4 2 mo  
H5 2 mo

120 130 140 150 160 170 180 190 200 210 220  
Consensus\_B  
HXB2  
Consensus H1 4 mo  
Consensus H2 2 mo  
Consensus H3 2 mo  
Consensus H4 2 mo  
H5 2 mo

230 240 250 260 270 280 290 300 310 320 330  
Consensus\_B  
HXB2  
Consensus H1 4 mo  
Consensus H2 2 mo  
Consensus H3 2 mo  
Consensus H4 2 mo  
H5 2 mo

340 350 360 370 380 390 400 410 420 430 440  
Consensus\_B  
HXB2  
Consensus H1 4 mo  
Consensus H2 2 mo  
Consensus H3 2 mo  
Consensus H4 2 mo  
H5 2 mo

450 460 470 480 490 500 510 520 530 540 550  
Consensus\_B  
HXB2  
Consensus H1 4 mo  
Consensus H2 2 mo  
Consensus H3 2 mo  
Consensus H4 2 mo  
H5 2 mo

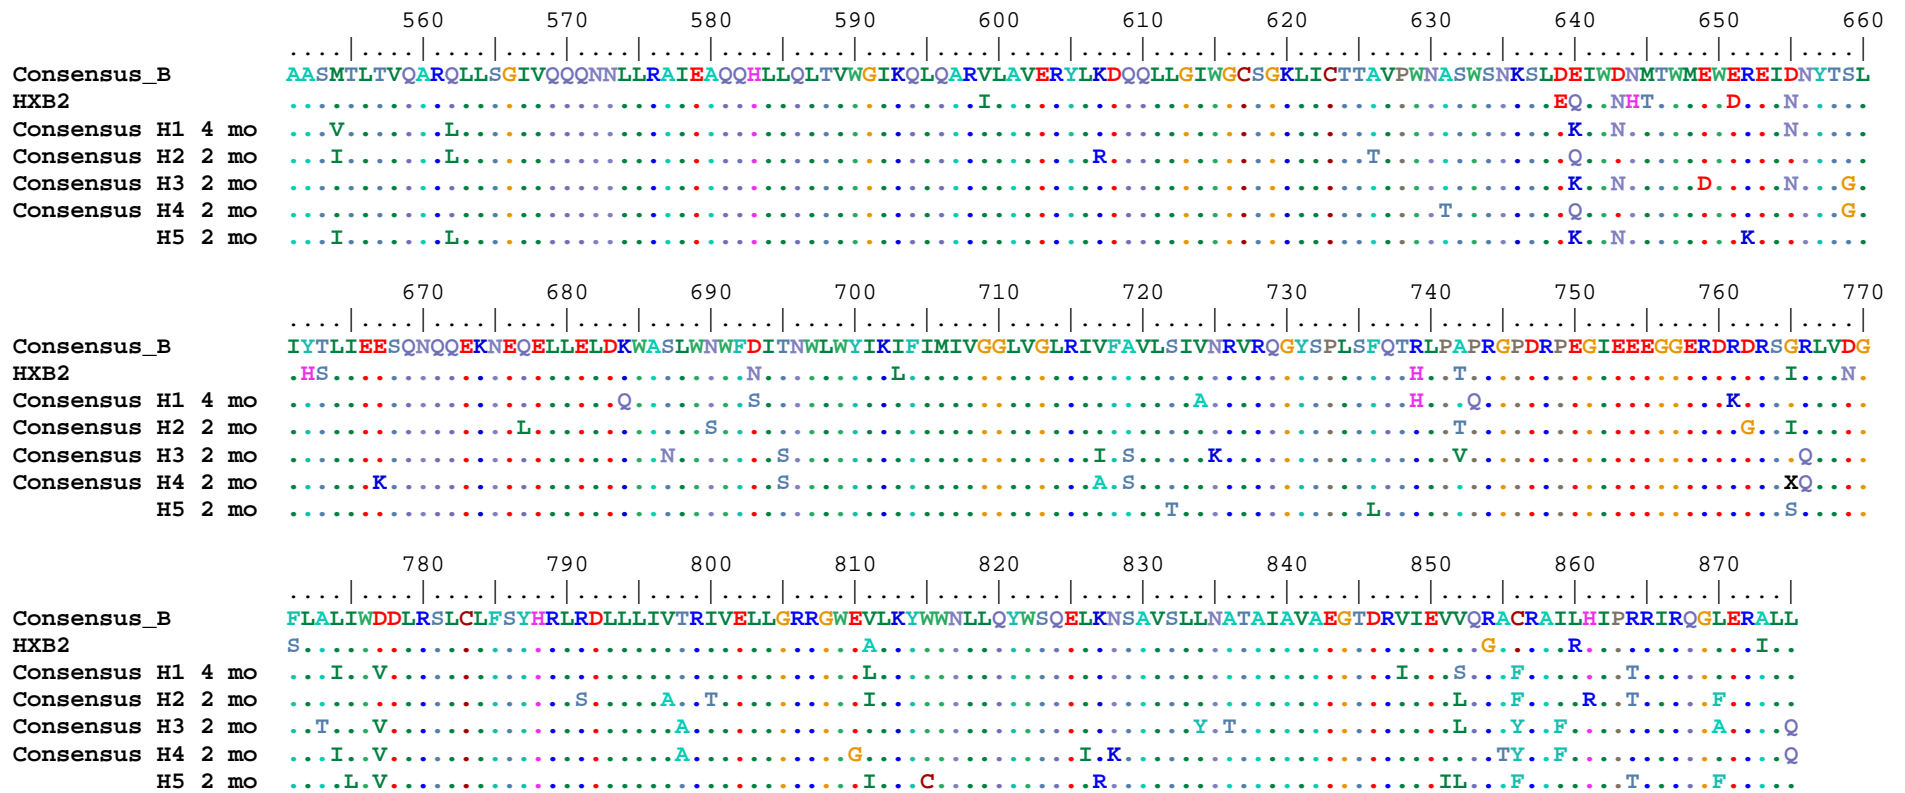

Supplementary Figure 1: Consensus gp160 sequences of the earliest virus variants from each patient aligned to the consensus B and HXB2 Env sequences. Since isolation of clonal virus variants was not successful for the earliest time point in individual H5, a single *env* sequence was generated from proviral DNA in patient PBMC from this time point. In those cases where no single residue was present in at least 50 % of the sequences from one patient, an X is shown.
